# Supplementary material
Source: PubMed Central journal article supplement (PMC58571)
Supplement: pnas_191182098_3.pdf [file pnas_191182098_3.pdf]

→ U3

TGGCAAGCTAGCTTAAGTAAACGCCATTTTGAAGGCATGGAAAAATACATAACTGAGAAT H.M  
 ..... C ..... H.M  
 ..... H.Δ  
 ..... H.Δ  
 ● E1  
 AGAGAAGTTCAGATCAAGGTCAGGAACAGATGGAACAGCTGAATATGGGCCAAACAGGAT H.M  
 ..... H.M  
 ..... C ..... H.Δ  
 ..... H.Δ  
 ..... H.Δ  
 ● E2 E1●  
 ATCTGTGGTAAGCAGTTCCTGCCCCGGCTCAGGGCCAAGAACAGATGGAACAGCTGAATA H.M  
 ..... H.M  
 ..... H.Δ  
 ..... H.Δ  
 ..... H.Δ  
 TGGGCCAAACAGGATATCTGTGGTAAGCAGTTCCTGCCCCGGCTCAGGGCCAAGAACAGA H.M  
 ..... H.M  
 ..... H.Δ  
 ..... H.Δ  
 ..... H.Δ  
 E2●  
 TGGTCCCCAGATGCGGTCCAGCCCTCAGCAGTTTCTAGAGAACCATCAGATGTTCCAGG H.M  
 ..... H.M  
 ..... H.Δ  
 ..... H.Δ  
 ..... H.Δ  
 GTGCCCAAGGACCTGAAATGACCCGTGTCCTTATTTGAACTAACCAATCAGTTCGCTTC H.M  
 ..... H.M  
 ..... H.Δ  
 ..... H.Δ  
 ..... H.Δ  
 TCGCTTGTGTTGCGCGCTTCTGCTCCCGAGCTC AATAAAA GAGCCACACACCCCTCAC H.M  
 ..... H.M  
 ..... H.Δ  
 ..... H.Δ  
 ..... H.Δ  
 → R  
 TCGGGGCGCCAGTCTTCCGATAGACTGCGTCGCCCCGGTACC CGTATTC CCAATAAAGCC H.M  
 ..... H.M  
 ..... C ..... C ..... T ..... H.Δ  
 ..... H.Δ  
 ..... H.Δ  
 ..... H.Δ  
TCTTGCTGTTGCA H.M  
 ..... H.M  
 ..... H.Δ  
 ..... H.Δ
