# Supplementary material
Source: PubMed Central journal article supplement (PMC58571)
Supplement: pnas_191182098_4.pdf [file pnas_191182098_4.pdf]

→ U3

TGGCAAGCTAGCTTAACTAACGCCATTTTGC AAGGCATGGAAAAATACATAACTGAGAAT R.M  
 ..... M.M  
 ..... M.M\*  
 ..... R.Δ  
 ..... M.Δ

AGAGAAGTTCAGATCAAGGTCAGGAAACAGATGGAACAGCTGAATATGGGCCAAACAGGAT R.M  
 ..... M.M  
 ..... M.M\*  
 ..... R.Δ  
 ..... M.Δ

ATCTGTGGTAAAGCAGTTCCTGCCCGGCTCAGGGCCAAGAACAGATGGAACAGCTGAATA R.M  
 ..... M.M  
 ..... T. M.M\*  
 ..... R.Δ  
 ..... M.Δ

TGGGCCAAACAGGATATCTGTGGTAAAGCAGTTCCTGTCCCGGCTCAGGGCCAAGAACAGA R.M  
 ..... C. M.M  
 ..... M.M\*  
 ..... R.Δ  
 ..... M.Δ

E2●  
 TGGTCCCCAGATGCGGTCCAGCCCTCAGCAGTTTCTAGAGAACCATCAGATGTTTCCAGG R.M  
 ..... M.M  
 ..... T. M.M\*  
 ..... R.Δ  
 ..... A. M.Δ

GTGCCCAAGGACCTGAAATGACCCTGTGCCTTATTTGAACTAACCAATCAGTTCGCCTTC R.M  
 ..... M.M  
 ..... M.M\*  
 ..... R.Δ  
 ..... M.Δ

TCGCTCTGTTCGCGCGCTTCTGCTCCCCGAGCTCAATAAAAAGAGCCACAAACCCCTCAC R.M  
 ..... M.M  
 ..... M.M\*  
 ..... R.Δ  
 ..... M.Δ

→ R  
 TCGCGCGGCCAGTCTCCGATAGACTGCGCTGCCCGGGTACCGGTATCCCAATAAAGCC R.M  
 ..... M.M  
 ..... M.M\*  
 ..... R.Δ  
 ..... G. M.Δ

TCTTGCTGTTTGC R.M  
 ..... M.M  
 ..... M.M\*  
 ..... R.Δ  
 ..... M.Δ
